# Supplementary material
Source: Springer Nature journal article supplement (https://www.springermedizin.de/resource/supplementary/13006_2005_4_MOESM1_ESM.pdf/9627818)

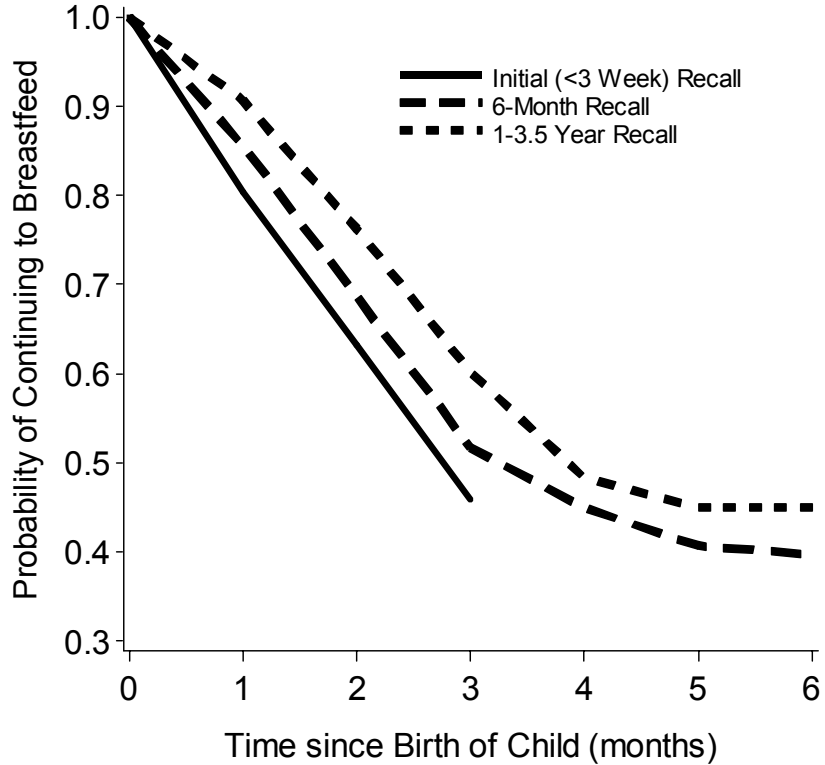

Supplement: MOESM1 [file 9627818]
